# Supplementary material for: Modular Evolution and Population Variability of Oikopleura dioica Metallothioneins
Source: PubMed Central journal article supplement (PMC8283569; doi:10.3389/fcell.2021.702688), 2021-07-02
Supplement: Table_1.pdf [file Table_1.pdf]

**Table S1. Primers used for *OdIMT1<sub>GAT</sub>* and *OdIMT2<sub>GAT</sub>* PCR-amplification and PCR conditions.**

| Gene                        | Forward                          | Reverse                                  | PCR conditions                                                                 |
|-----------------------------|----------------------------------|------------------------------------------|--------------------------------------------------------------------------------|
| <i>OdIMT1<sub>GAT</sub></i> | 5' GGGGAATCGATATTGACAAATCTCAA 3' | 5' GGGCTCGAGTTATTCCGCTGTGCTGGTCGGGCAG 3' | 94°C 3 min, 94°C 20 sec, 55°C 30 sec and 72°C 1.30 min x40 cycles; 72°C 10 min |
| <i>OdIMT2<sub>GAT</sub></i> | 5' GGGGGATCCATGGAAGTAAAACGACC 3' | 5' GGTTCAGACGAAATTTGTCCCG 3'             | 98°C 30sec; 98°C 10 sec, 60°C 30 sec and 72°C 3 min x35 cycles; 72°C 10 min    |
