# Supplementary material for: Modular Evolution and Population Variability of Oikopleura dioica Metallothioneins
Source: PubMed Central journal article supplement (PMC8283569; doi:10.3389/fcell.2021.702688), 2021-07-02
Supplement: Table_2.pdf [file Table_2.pdf]

**Table S2. Accession numbers and protein sequence of OdiMTs from different *O. dioica* populations.**

| <b>OdiMT1</b>          |                |                                                                                                                                                                                                                                                                                                                                                                                                                   |
|------------------------|----------------|-------------------------------------------------------------------------------------------------------------------------------------------------------------------------------------------------------------------------------------------------------------------------------------------------------------------------------------------------------------------------------------------------------------------|
| OdiMT1 <sub>NOR</sub>  | CABV01001936.1 | MDPVCSFRCCCEENCAGCVDCPAGCDPCKCTLEVCKKVCEGCKDCPPGCEPCKCEKCKSTKKCKSNCCPTSTAE                                                                                                                                                                                                                                                                                                                                        |
| OdiMT1 <sub>CAT</sub>  | MH547307       | MDPVCSFRCCCEENCAGCVDCPAGCDPCKFTMEVCKKVCEGCKDCPPGCEPCKCAKCKSTKQCKSNCCPTSTAE                                                                                                                                                                                                                                                                                                                                        |
| ΨOdiMT1 <sub>CAT</sub> | MH577048       | NCAGCVDCPAGCDPCKCTLEVCKKVCEGCKDCPPGCEPCKCAKCKSTKQCKSNCCPTSTAE                                                                                                                                                                                                                                                                                                                                                     |
| OdiMT1 <sub>ORE</sub>  | MH577047       | MDCSFRCCCEENCTGCADCPAGCDPCKCTLVCKKVCEGADCPAGCDPCKCAKCKSNKQCKTSCCPTSSE                                                                                                                                                                                                                                                                                                                                             |
| OdiMT1 <sub>OKI</sub>  | SRA Project    | MDCSTRCCCEASCEGCVSPPGCDPCKCSLDSCKKVQGCRDCPPGCDPCKCKSANGCKSCCAATNTSA                                                                                                                                                                                                                                                                                                                                               |
| OdiMT1 <sub>OSA</sub>  | SRA Project    | MEFCSFRCCCEGNCPGADCPAGCDPCKCTLVCKKVCEGCKDCAAGCDPCKCAKCKSNKQCKTSCCPTSSE                                                                                                                                                                                                                                                                                                                                            |
| <b>OdiMT2</b>          |                |                                                                                                                                                                                                                                                                                                                                                                                                                   |
| OdiMT2 <sub>NOR</sub>  | CABV01001042.1 | MEVKRPNNCCPAKCLGCKGCPPGCEPCICNMDTCKNICNKCKECPKNEFGCDPCKCPKCSKLGCTCDCCHKKCCVTDCDG<br>CKTCPPGCEPCKCSMNACKKVCKQCKNCRKSESGDPCECSKCALGCKDCCKPDTCCCEASCEGCKNPPGCEPCKCTLN<br>CCMKICDDCKDCPKSENGCDPCNCRKCSRKGCDCCPSDDCKASCEGCINCPPGCDPCECSMDECKKICKKCNCRKG<br>ESGDPCECRKCSRNGCDCCKPKDSCEASCEGCTDCPQGCKPCKCTMNSCMKTCDKCKDCPKSASGCDPCECLKCSRK<br>GCEDCCPQKNDCEAFQCGCKNPPGCPNCKCTLNFCALICNECKDCKPSDIGCDPCNVCKCSAKGCKDCCKPKCC |
| OdiMT2 <sub>CAT</sub>  | MH577044       | MEVKRPNNCCPAKCLGCKGCPPGCEPCICKMDTCKNICNKCKECPKNEFGCDPCKCPKCSKLGCTCDCCHKKCCVTDCDG<br>SKTCPPGCEPCKCSMNACKKVCKQCKNCRKSESGDPCECSKCALGCKDCCKPDTCCCEVSEGCKNPPGCEPCKCTM<br>NSCMKTCDKCKDCPKSASGCDPCECRKCSRKGCDCCCPQKNDCEVFCQCGCKNPPGCPNCKCTLNFCALICNECKDCKP<br>KSDTGCDPCYCVKCSAKGCKDCCKPKCS                                                                                                                               |
| ΨOdiMT2 <sub>CAT</sub> | MH577045       | MEVKRLNNCCPAKCLGCKRCPGCEPCICKMDTCKNICNKCAKRTSSAATLASVLSAPSLDAHAIAATKNVVLPIAMDVR<br>LAPRAVNHASAQ                                                                                                                                                                                                                                                                                                                   |
| OdiMT2 <sub>ORE</sub>  | MH577046       | MEVKRPNNCCPAKCLGCKGCPPACDPCICKMDSCKNICNCKECPKDESGCDPCECPKCAKLGCTCACCHKKCCIAACDG<br>CKTCPPGCEPCKCSMNACKKVCKQCKNCRKSESGDPCECSKASKGCKDCCKPNDCCCEASCEGCKNPPGCEPCKCTM<br>NGCMKTCDKCKDCPKSENGCDPCNCRKCSRKGCDCCPSDDCKASCEGCINCPPGCDPCECSMDACKKSCEKCKDCR<br>KSESGDPCECRKCSRNGCDCCKPADSCDASCDGCKNPPGCEPCKCTMNGCMKTCDKCKDCPKSASGCDPCKCGKCSKKGCDCCPKND<br>CCEAFQCGCKNPPGCYPCKCTLNCTKMCNECKNCPKSDTGCDPCKCAKCKSTKGCKDCCKPKCC   |
| OdiMT2 <sub>OKI</sub>  | SRA Project    | MEVQQQRNNCCPAKCDGCKDCPPGCVPCCLTDACTKICNCKNPPGCDPCGCEKCAKNGCTCDCCEQPCCETSCEG<br>CKNPPGCPNCKCEMEKCKKICKECKTCKPGENGCDPCQCKKCSKMGCKSCCPKQPCCEVSCAGCKNPPGCPNCKCE<br>MASCKKICSGCADCPPGCDPCKCAKCKSTKGCKDCCKPKSCC                                                                                                                                                                                                         |
| OdiMT1 <sub>OSA</sub>  | SRA Project    | MEVKRPNNCCIAACDGCKNPPGCDPCKCSMKACKKVCEQCKNCRKSELGCDPCECSKASEGCKDCCKPKDSCEASCE<br>GCKDCPPGCEPCKCTMNGCMKICDKCKDCPKSENGCDPCNCRKCSRKGCDCCPSDDCKASCEGCINCPPGCDPCECS<br>MDACKKSCEKCKDCRKESESGDPCECRKCSRKGCDCCPADSCCEASCEGCKNPPGCDPCKCTLNCGMKTCDKCKDCP<br>KSDKGDPCQCKKCSRNGCEDCCKPKNDCEAFQCGCKNPPGCPNCKCTLNCTKMCNECKNCPKSDTGCDPCKCAK<br>CSTNGCKDCCKPKCC                                                                  |
